# Supplementary material for: Efficacy of Remdesivir and Neutralizing Monoclonal Antibodies in Monotherapy or Combination Therapy in Reducing the Risk of Disease Progression in Elderly or Immunocompromised Hosts Hospitalized for COVID-19: A Single Center Retrospective Study
Source: MDPI journal article supplement (doi:10.3390/v15051199), 2023-05-19
Supplement: s1 [file s1]

## Supplementary

**Table S1.** Standardized differences of variables used to generate the IPTW model.

|                                                       | Standardized Differences<br>before Applying IPTW<br>(%) <sup>a</sup> | Standardized Differences<br>after Applying IPTW<br>(%) <sup>a</sup> |
|-------------------------------------------------------|----------------------------------------------------------------------|---------------------------------------------------------------------|
| <b>Variables influencing Treatment<br/>assignment</b> |                                                                      |                                                                     |
| Age                                                   | 21.4%                                                                | 6.4%                                                                |
| Sex                                                   | 16.3%                                                                | 7.9%                                                                |
| Secondary Infections                                  | 11.5%                                                                | 2.8%                                                                |
| Time from Symptom Onset to Therapy                    | 3.3%                                                                 | 4.3%                                                                |
| COVID-19 Severity at admission                        | 11.6%                                                                | 4.6%                                                                |

**Legend:** <sup>a</sup> Absolute value of standardized differences displayed. A standardized difference greater than 10% is considered to indicate meaningful imbalance between groups. Overidentification test for covariate balance:  $\chi^2 = 4.41364$ ;  $p = 0.6209$ . IPTW = inverse probability of treatment weighting.
